# Supplementary material for: Tuning the crystalline phase and morphology of the YF3:Eu3+ microcrystals through fluoride source
Source: Royal Society of Chemistry journal article supplement (doi:10.1039/c3ce40554k), 2013-01-01
Supplement: c3ce40554k.pdf [file c3ce40554k.pdf]

# Supplementary Information

## Tuning the Crystalline Phase and Morphology of the $\text{YF}_3\text{:Eu}^{3+}$ Microcrystals through Fluoride Source

Shyam Sarkar,<sup>a</sup> and Venkataramanan Mahalingam<sup>a\*</sup>

<sup>a</sup> Department of Chemical Sciences, Indian Institute of Science Education and Research (IISER), Kolkata, Mohanpur, West Bengal, India.

**Table S1: Lattice parameters of  $\text{Eu}^{3+}$ -doped  $\text{YF}_3$  microcrystals.**

| Sample                       | Fluoride source       | a (Å)  | b (Å)  | c (Å)  | $\alpha$ (°) | $\beta$ (°) | $\gamma$ (°) |
|------------------------------|-----------------------|--------|--------|--------|--------------|-------------|--------------|
| $\text{YF}_3\text{:Eu}^{3+}$ | NaF                   | 5.6458 | 5.6458 | 5.6458 | 90           | 90          | 90           |
| $\text{YF}_3\text{:Eu}^{3+}$ | $\text{NaBF}_4$       | 6.3530 | 6.8500 | 4.3930 | 90           | 90          | 90           |
| $\text{YF}_3\text{:Eu}^{3+}$ | $\text{NH}_4\text{F}$ | 6.4340 | 6.9430 | 4.4290 | 90           | 90          | 90           |

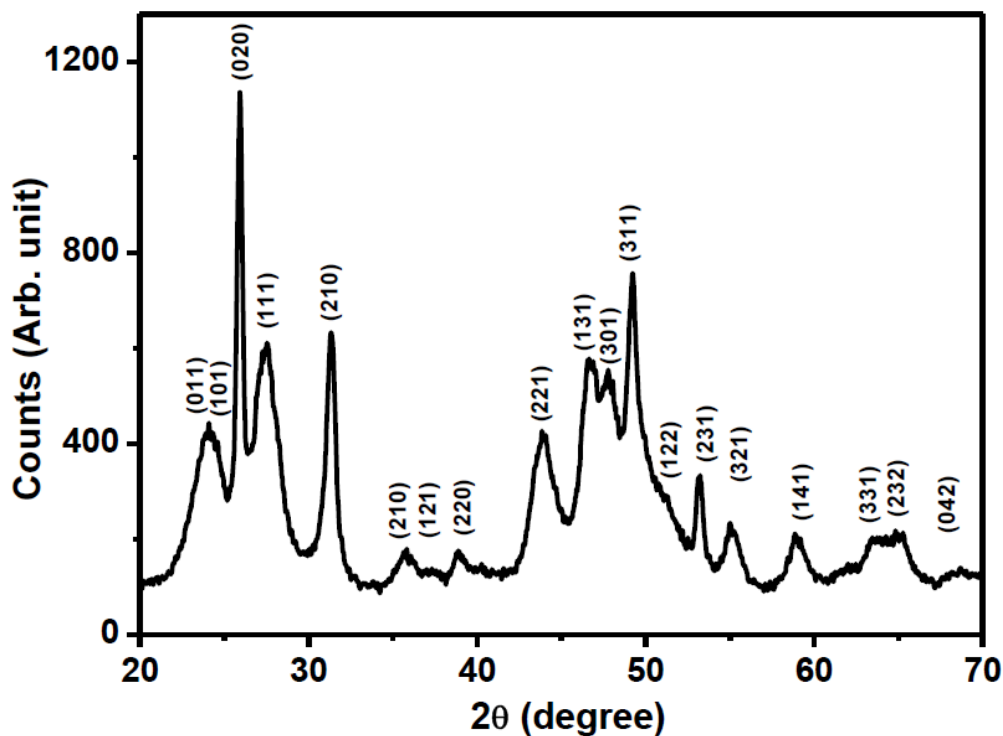

**Fig. S1** Powder XRD pattern of  $\text{Eu}^{3+}$ -doped  $\text{YF}_3$  microcrystals prepared without pyridine.

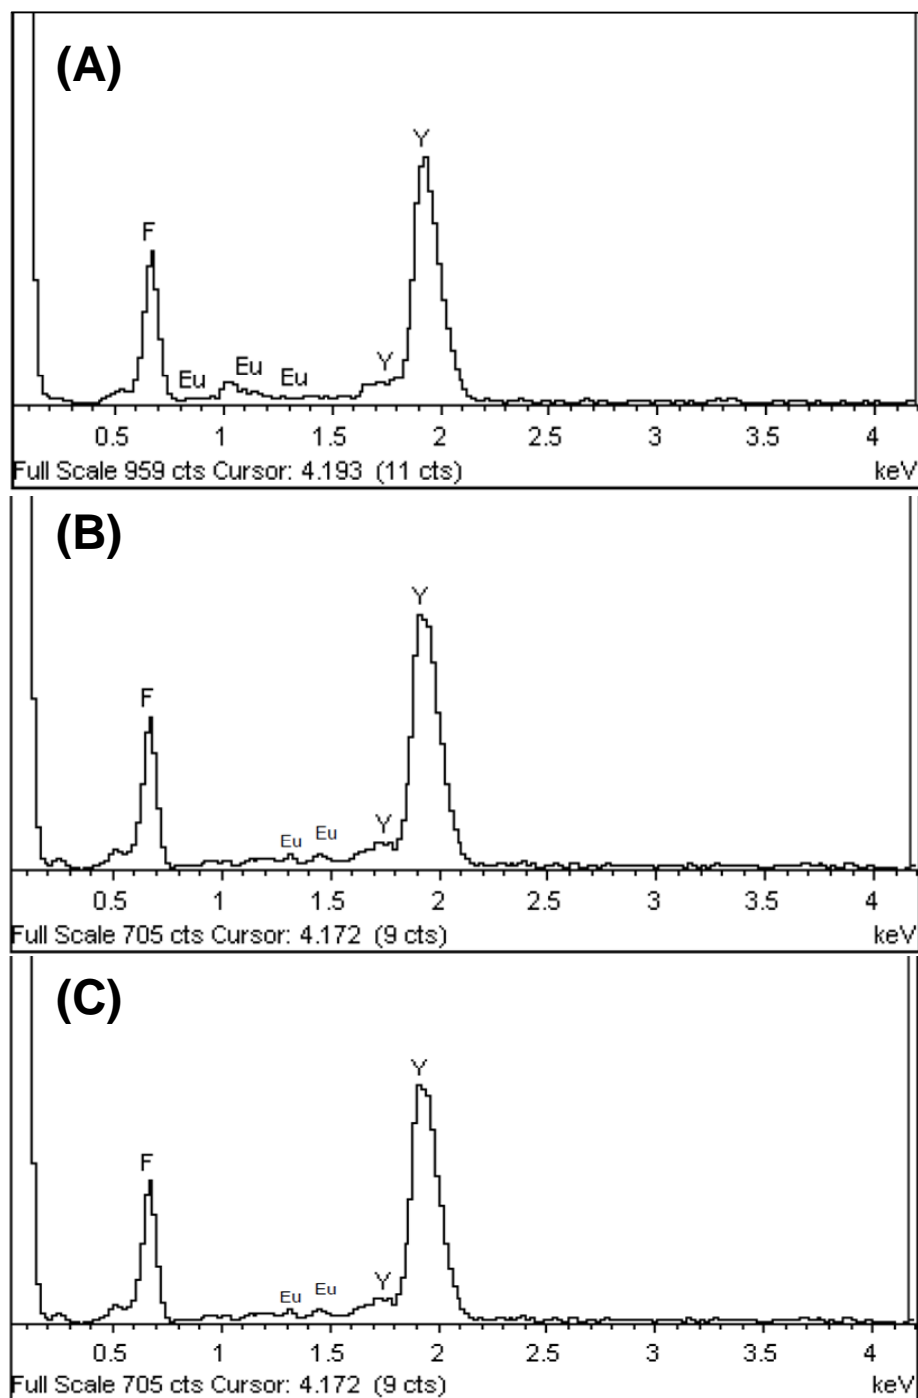

**Fig. S2** EDX spectra of  $\text{Eu}^{3+}$ -doped  $\text{YF}_3$  microcrystals prepared with (A) NaF (B)  $\text{NaBF}_4$  and (C)  $\text{NH}_4\text{F}$  as fluoride sources.

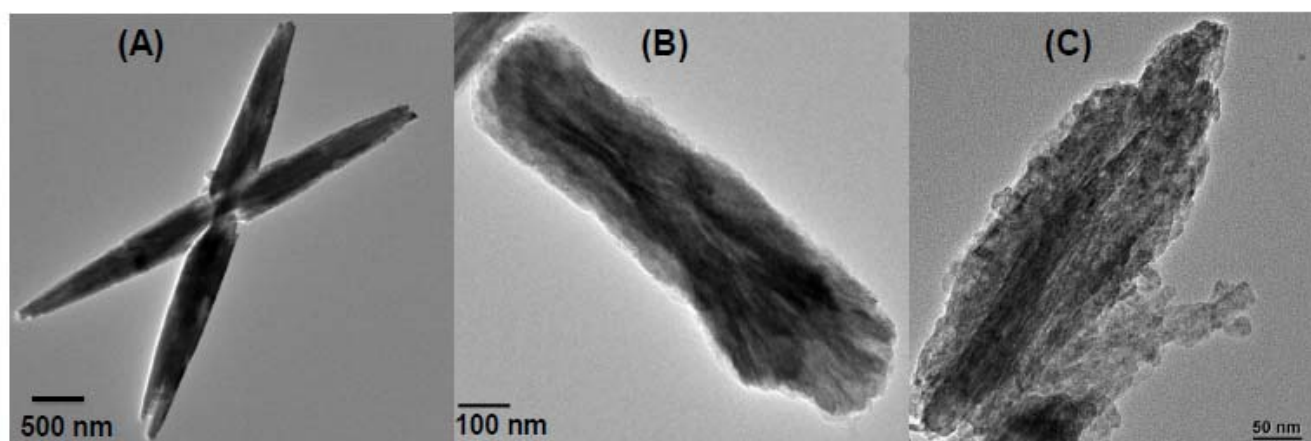

**Fig. S3** HRTEM images of Eu<sup>3+</sup>-doped YF<sub>3</sub> microcrystals prepared using different fluoride sources (A) NaF (B) NaBF<sub>4</sub> and (C) NH<sub>4</sub>F.

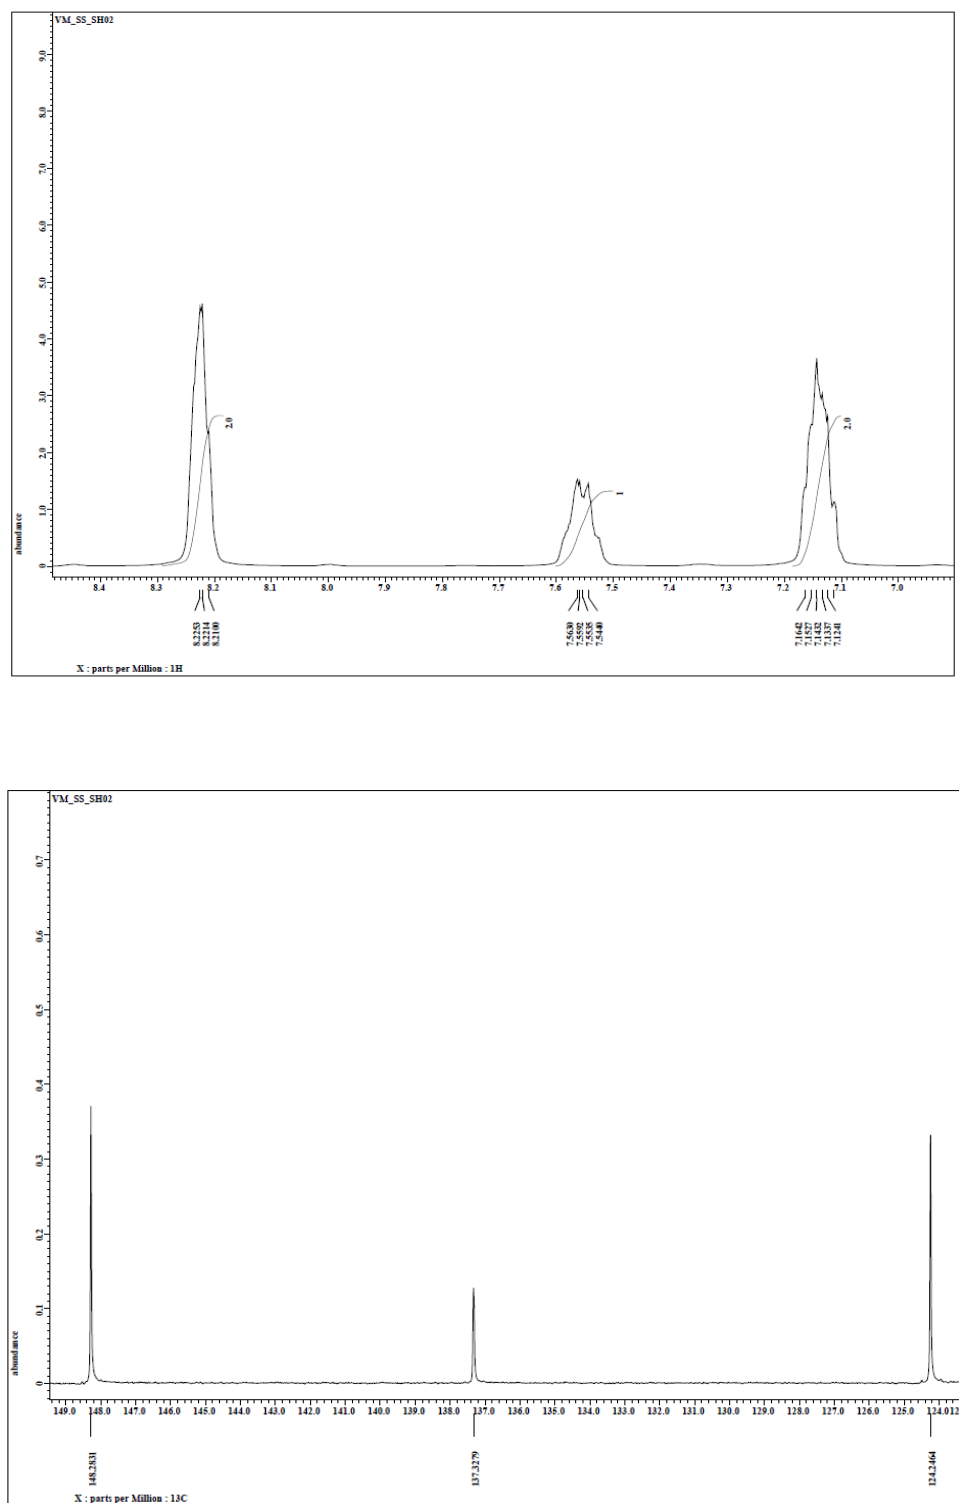

**Fig. S4** (top)  $^1\text{H}$  and (bottom)  $^{13}\text{C}$ -NMR spectrum of pyridine functionalised  $\text{Eu}^{3+}$ -doped  $\text{YF}_3$  microcrystals prepared using NaF as fluoride source.

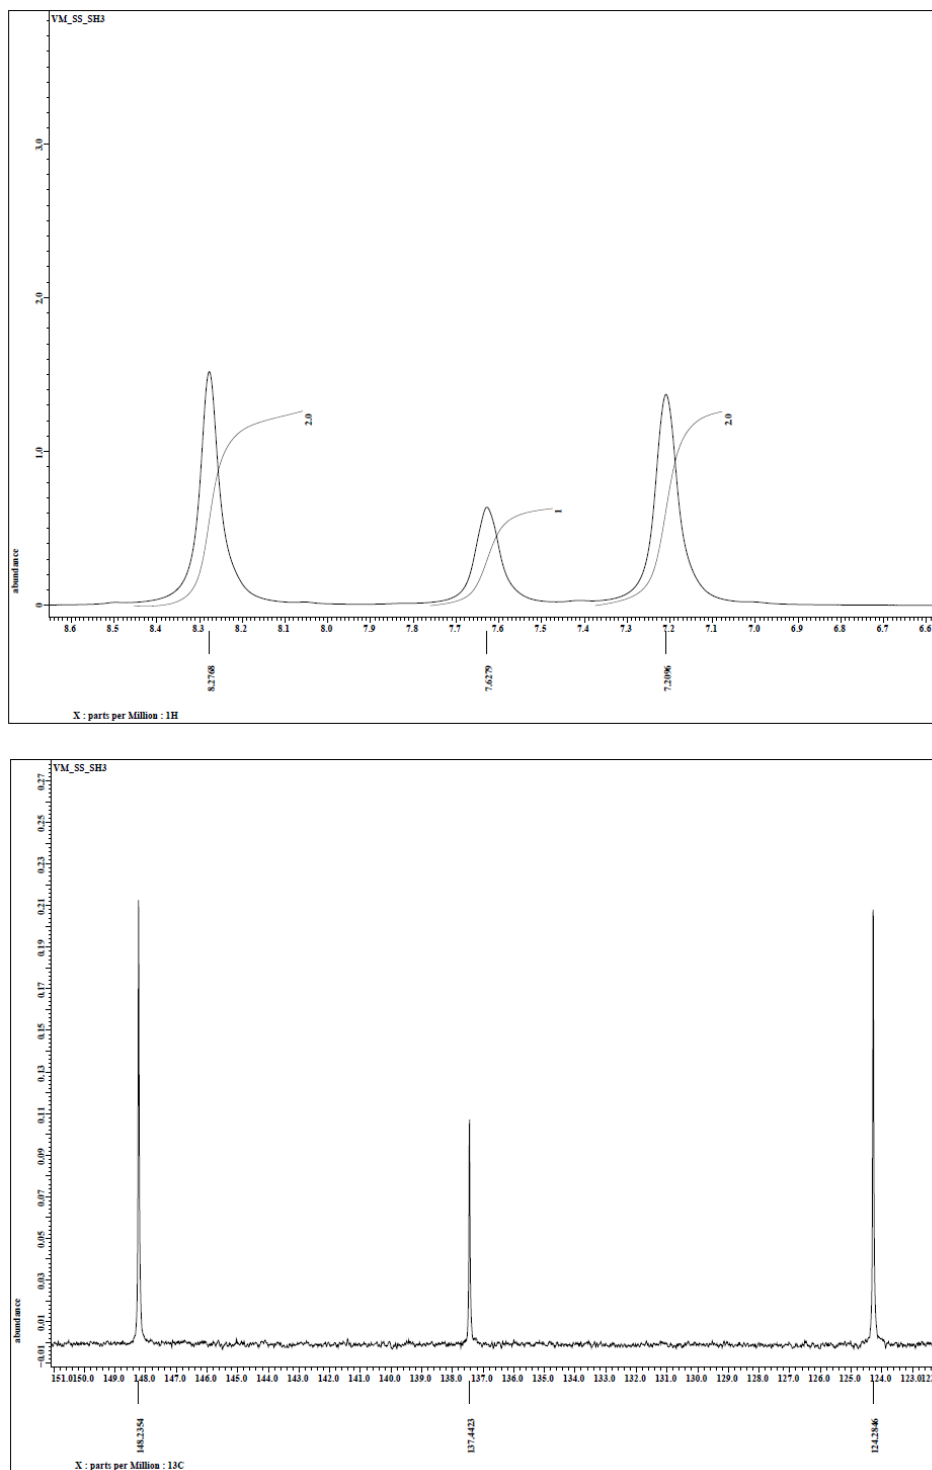

**Fig. S5** (top)  $^1\text{H}$  and (bottom)  $^{13}\text{C}$ -NMR spectrum pyridine functionalised  $\text{Eu}^{3+}$ -doped  $\text{YF}_3$  microcrystals prepared using  $\text{NaBF}_4$  as fluoride source.

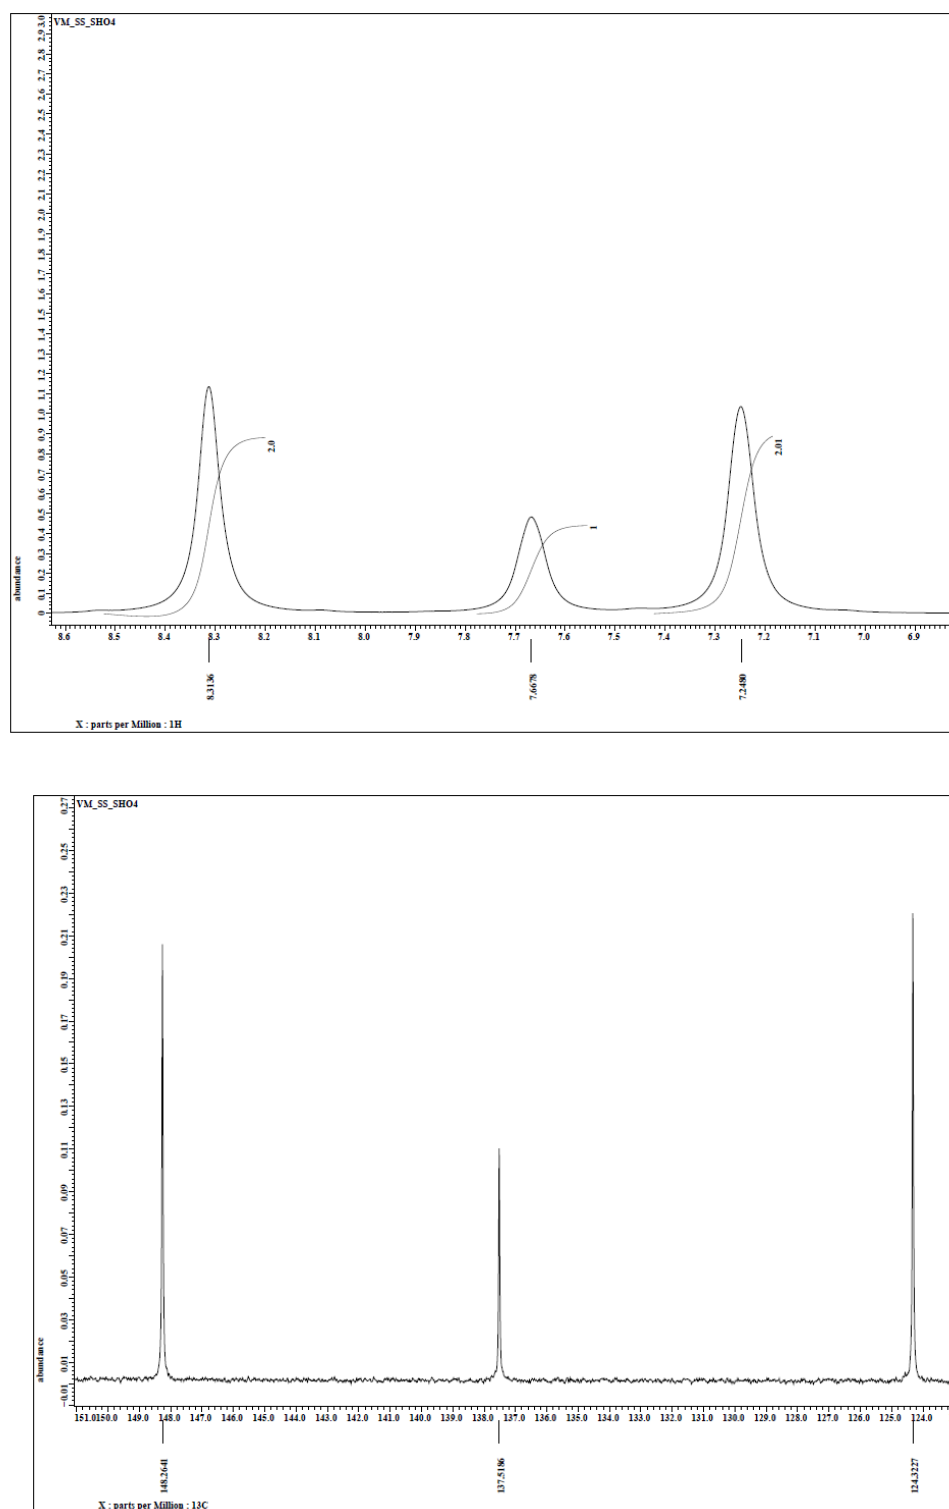

**Fig. S6** (top)  $^1\text{H}$  and (bottom)  $^{13}\text{C}$ -NMR spectrum of pyridine functionalised  $\text{Eu}^{3+}$ -doped  $\text{YF}_3$  microcrystals prepared using  $\text{NH}_4\text{F}$  as fluoride source.

[**Note:** All the  $^1\text{H}$ -NMR spectra of pyridine functionalized  $\text{Eu}^{3+}$ -doped  $\text{YF}_3$  microcrystals prepared using different fluoride sources ( $\text{NaF}$ ,  $\text{NaBF}_4$ , and  $\text{NH}_4\text{F}$ ) contains three signals with the integral intensity ratio of 2:1:2 which correspond to the three chemically different protons in the pyridine molecule. These signals originate from the  $\alpha$ -protons (chemical shift  $8.2 \pm 0.1$  ppm),  $\gamma$ -proton ( $7.5 \pm 0.1$  ppm) and  $\beta$ -protons ( $7.1 \pm 0.1$  ppm) in  $\text{D}_2\text{O}$  solvent. Similarly, all the  $^{13}\text{C}$ -NMR spectra of pyridine functionalized  $\text{Eu}^{3+}$ -doped  $\text{YF}_3$  microcrystals prepared using different fluoride sources ( $\text{NaF}$ ,  $\text{NaBF}_4$ , and  $\text{NH}_4\text{F}$ ) contains three signals which correspond to the  $\alpha$ -carbon (chemical shift  $148.2 \pm 0.01$  ppm),  $\gamma$ -carbon (chemical shift  $137.4 \pm 0.1$  ppm), and  $\beta$ -carbon (chemical shift  $124.2 \pm 0.1$  ppm) in  $\text{D}_2\text{O}$  solvent.

The results confirm (shown in Fig. S4-S6) the binding of the pyridine molecules to the microcrystals. While there is hardly any change in the  $^{13}\text{C}$  NMR spectra, in the  $^1\text{H}$  NMR there is a slight difference in the broadening of the peaks. We presume the difference in the broadening of the peaks between samples is likely due to the difference in the morphology. This causes a change in the orientation of the pyridine molecules thus affecting the rotational freedom.

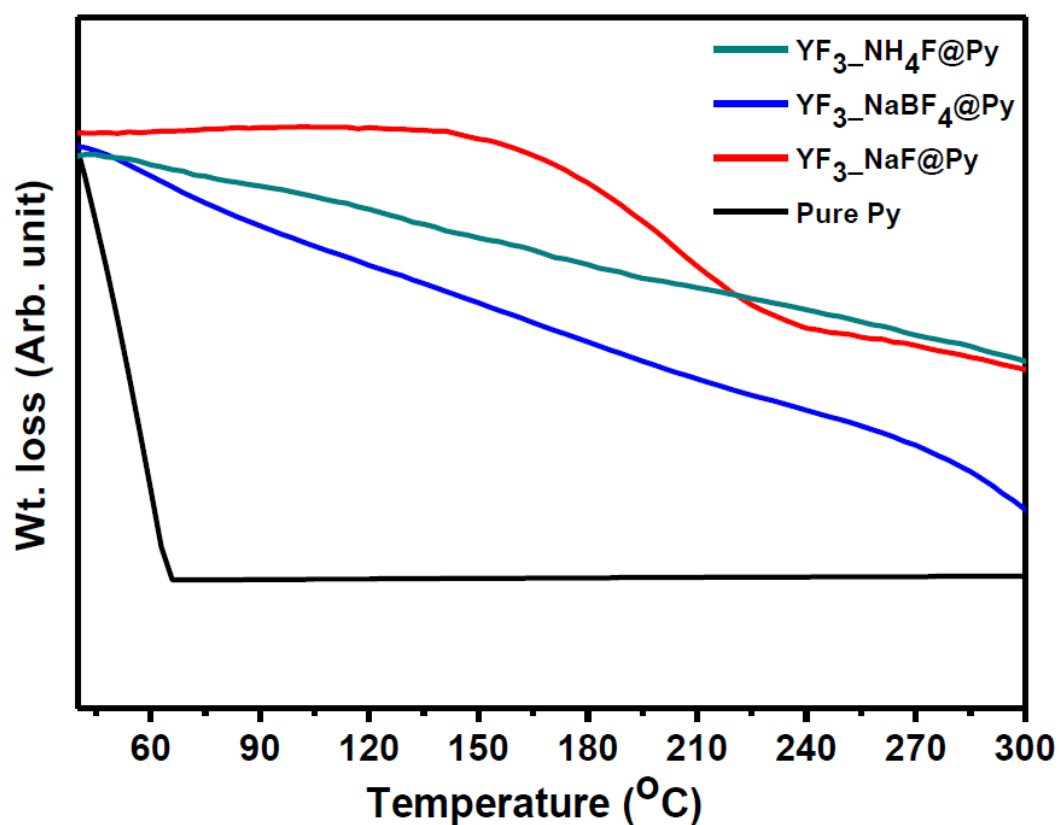

**Fig. S7** TGA patterns for Eu<sup>3+</sup>-doped YF<sub>3</sub> microcrystals prepared using NaF, NaBF<sub>4</sub> and NH<sub>4</sub>F as fluoride source.



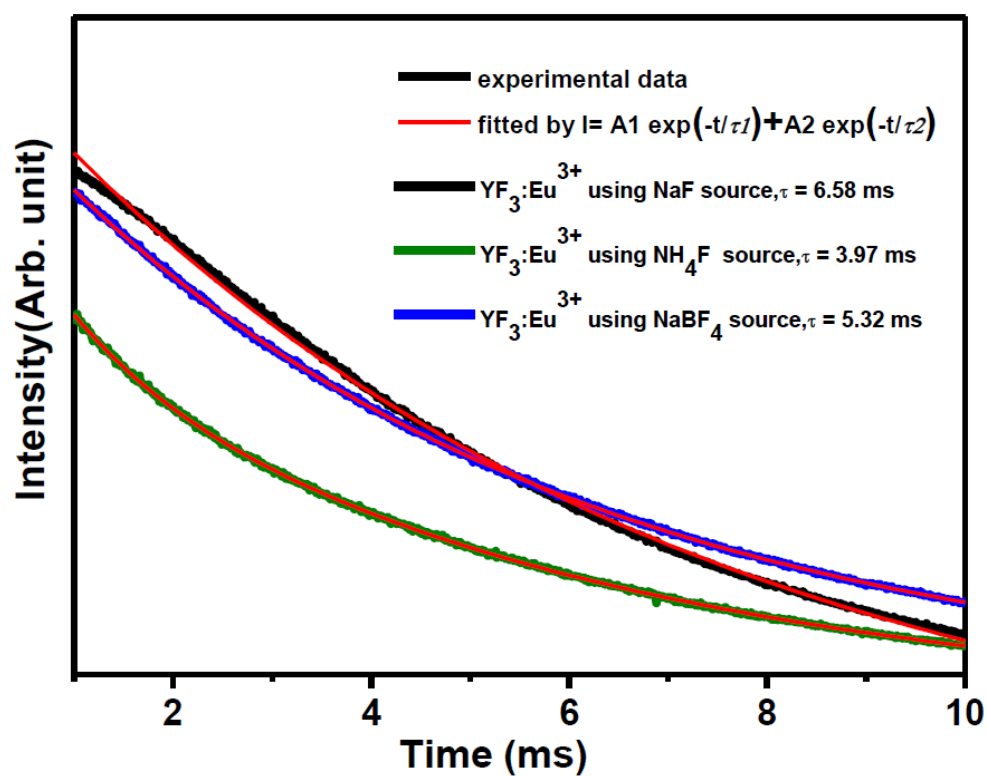

**Fig. S8** Photoluminescence decay curves of 5 mol%  $\text{Eu}^{3+}$ -doped  $\text{YF}_3$  microcrystals prepared using  $\text{NaF}$ ,  $\text{NaBF}_4$  and  $\text{NH}_4\text{F}$  as fluoride source.

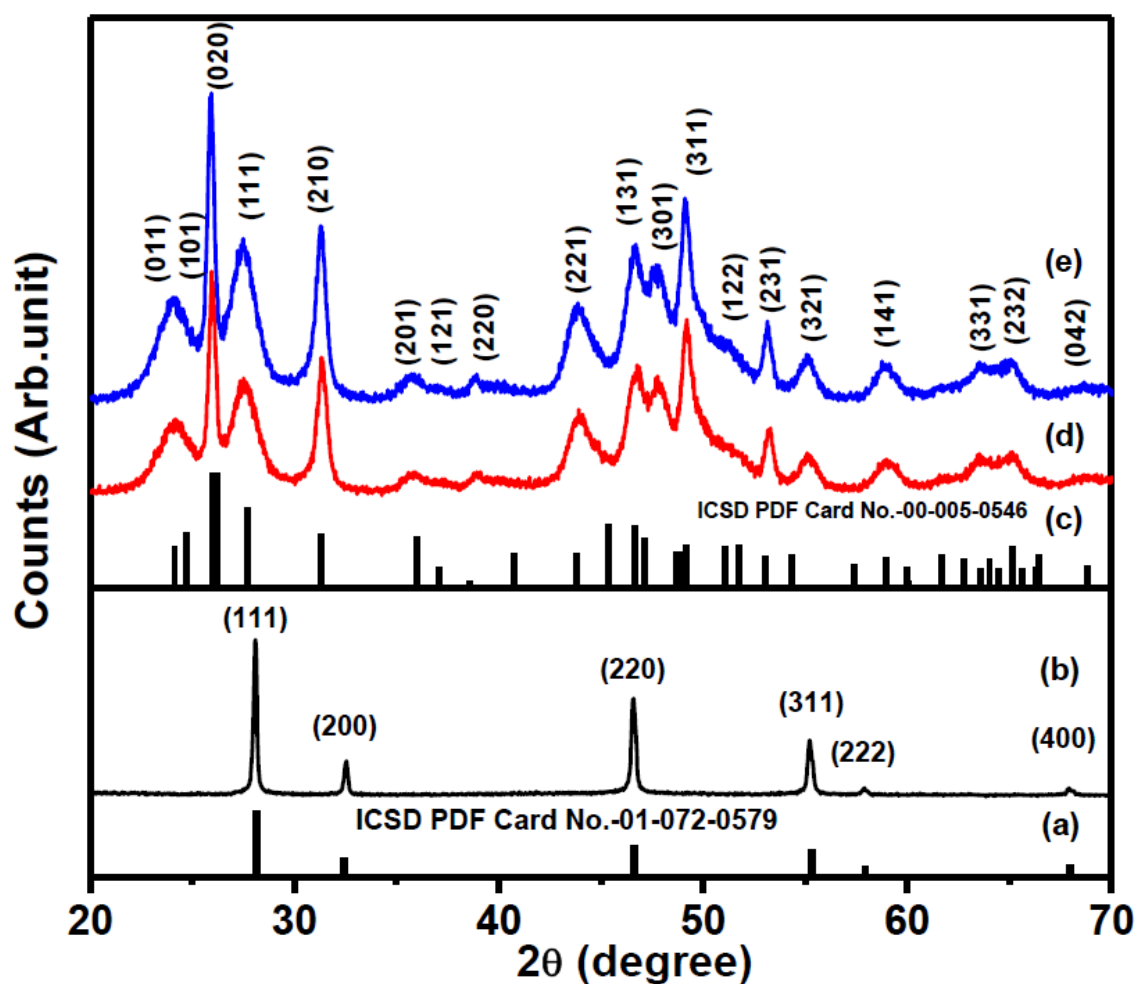

**Fig. S9** XRD patterns of  $\text{Eu}^{3+}$ -doped  $\text{YF}_3$  microcrystals prepared without capping ligands using (b) NaF, (d)  $\text{NaBF}_4$  and (e)  $\text{NH}_4\text{F}$  as fluoride precursors. The corresponding standard patterns are (a) and (c).

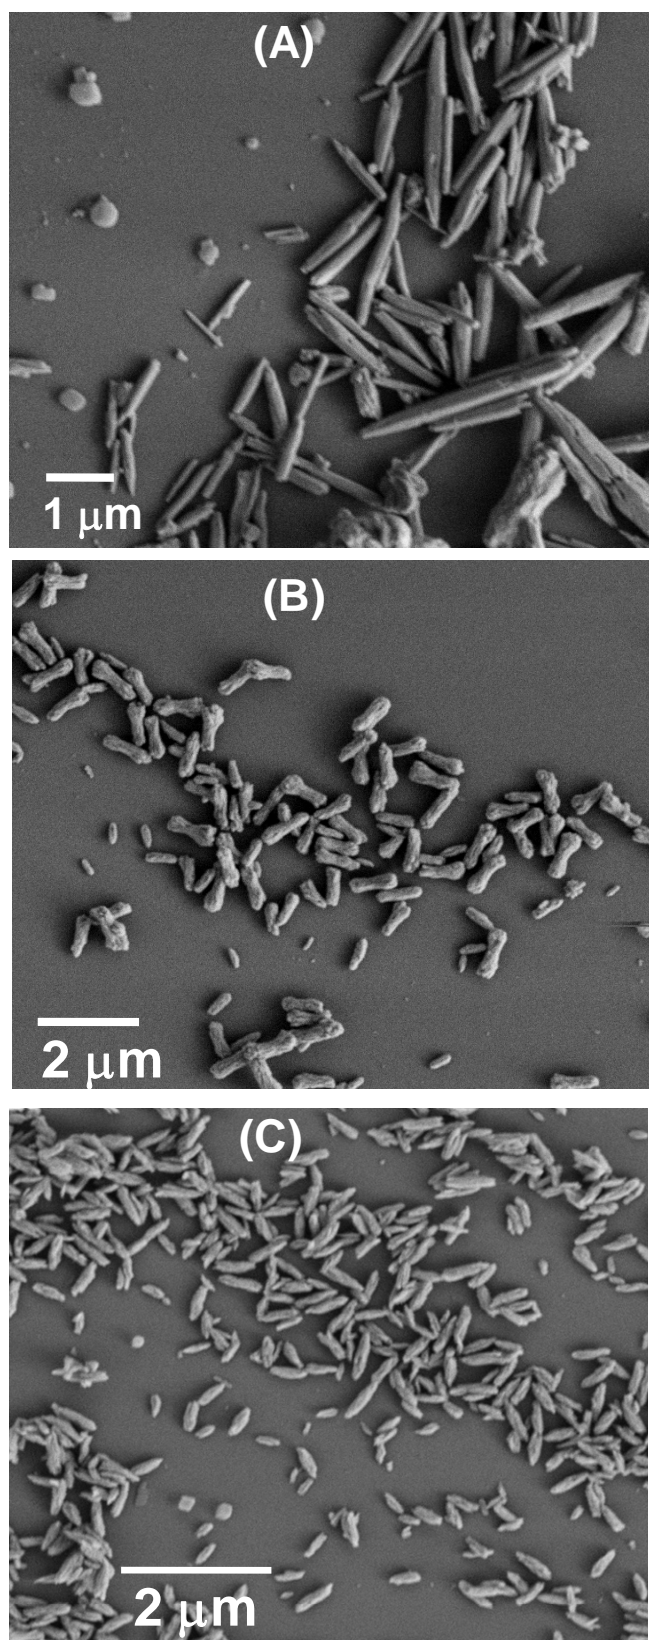

**Fig. S10.** SEM images of Eu<sup>3+</sup>-doped YF<sub>3</sub> microcrystals prepared using (A) NaF, (b) NaBF<sub>4</sub> and (c) NH<sub>4</sub>F without the capping ligands pyridine.
